# Supplementary material for: The 3D organisation of mitochondria in primate photoreceptors
Source: PubMed Central journal article supplement (PMC8458444; doi:10.1038/s41598-021-98409-7), 2021-09-22
Supplement: 41598_2021_98409_MOESM2_ESM.pdf [file 41598_2021_98409_MOESM2_ESM.pdf]

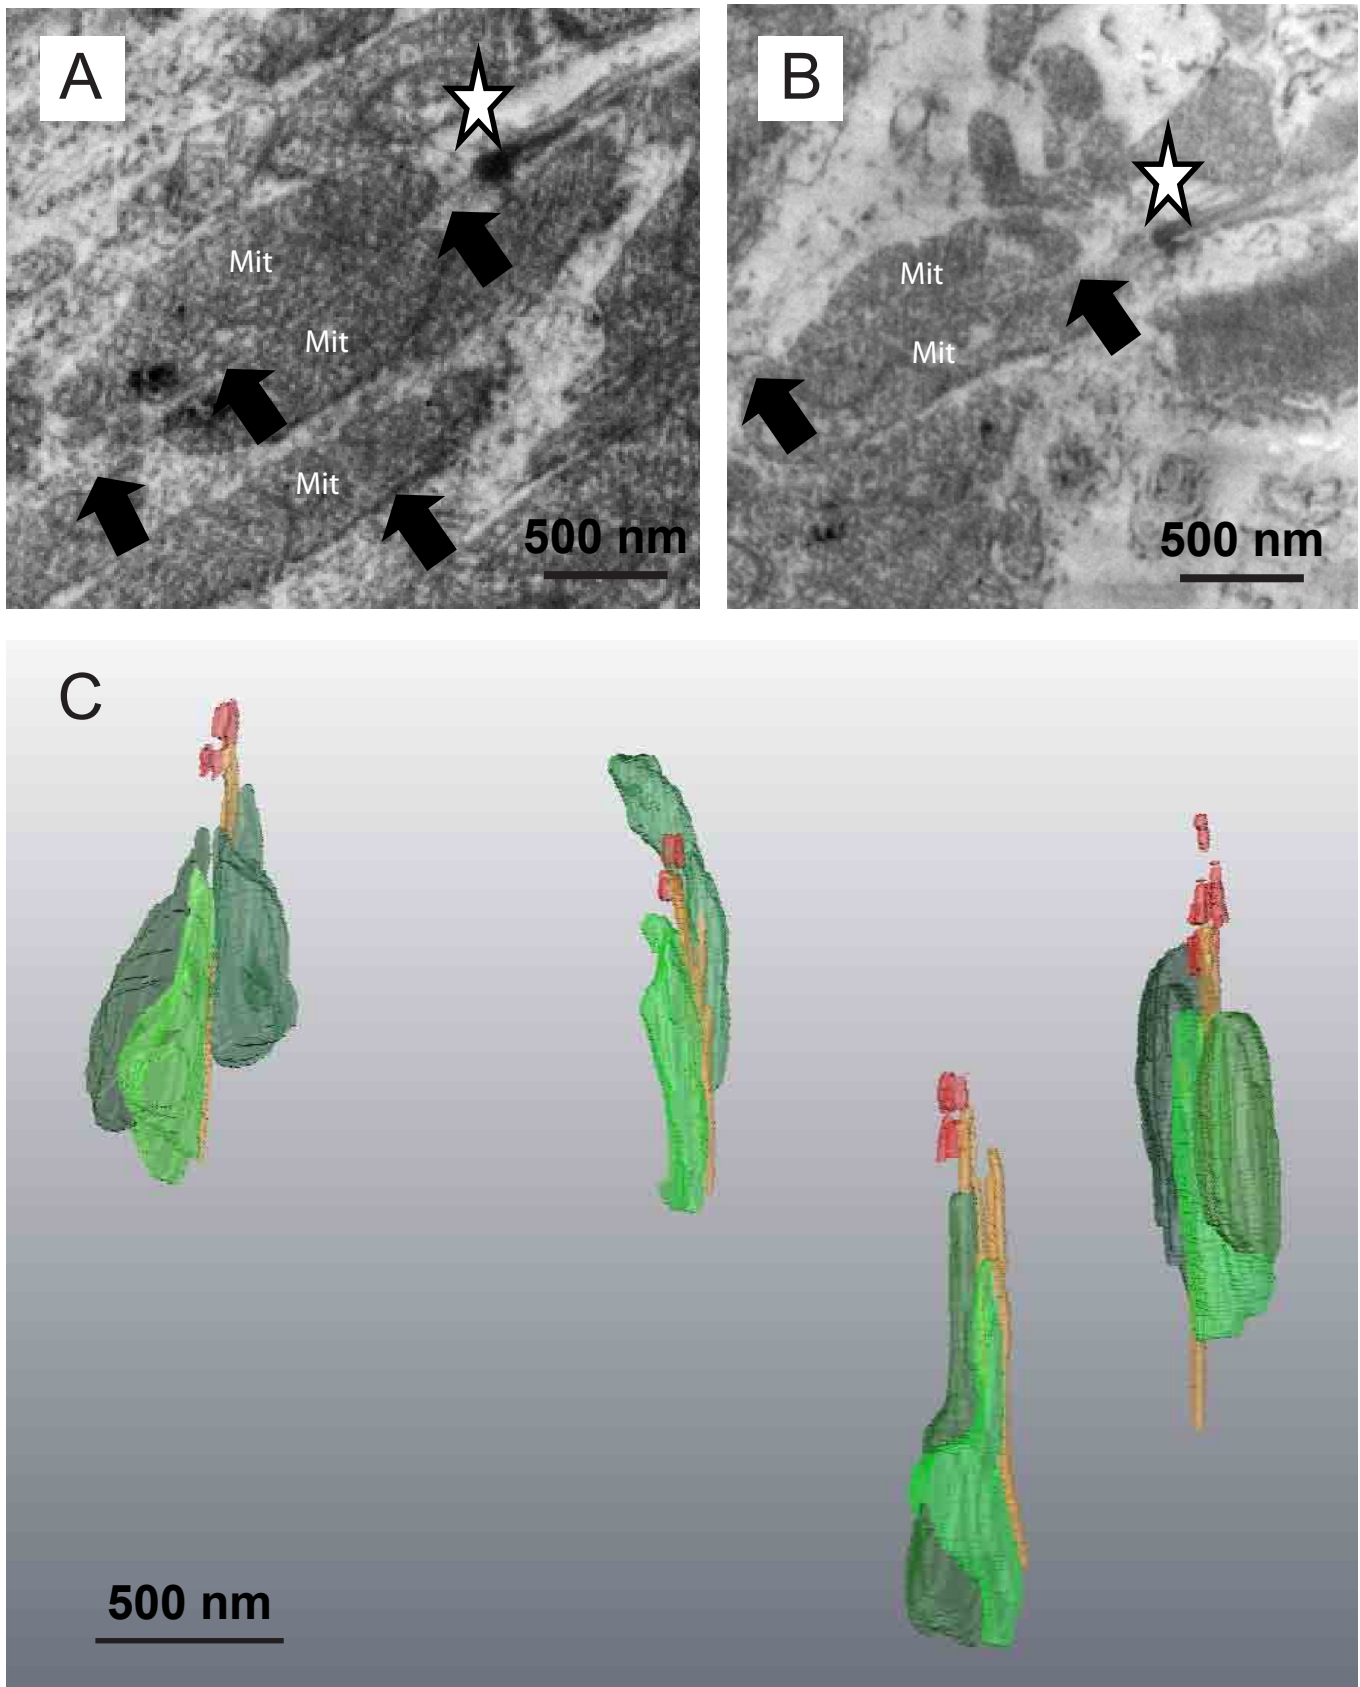

### Supplementary figure 2

Alignment of mitochondria with the rootlet in rabbit rods.

**A-B:** Single image from a SBF-SEM stack showing mitochondrial association with the ciliary rootlet in the vicinity of the basal body.

The ciliary rootlet is just visible as a punctate line running between the mitochondria.

Mitochondria (Mit), basal body (white star), rootlet (black arrows).

**C:** 3-dimensional reconstruction from SBF-SEM stacks showing mitochondria associating with the rootlet.

Mitochondria (green), paired basal bodies (red), rootlet (orange).
